# Supplementary material for: A Straightforward Approach to Analyze Skeletal Muscle MRI in Limb-Girdle Muscular Dystrophy for Differential Diagnosis: A Systematic Review
Source: MDPI journal article supplement (doi:10.3390/muscles2040029), 2023-11-08
Supplement: s1 [file s1]

For each genotype, the included studies, the grading system used, the imaging site, and the results are shown. If the name of the individual muscle included in the image is known, the corresponding square is surrounded by a thick frame; otherwise, the square is surrounded by a thin frame or no frame. If the muscle is clearly not being evaluated, the cells are painted gray. The meaning of each symbol is as follows; Muscles not mentioned by the authors are unmarked, and those considered 'spared' are listed as '-'. Muscles with the adjectives such as 'severely', 'early', etc., were given as '++', and muscles that were only mentioned as having certain degree of myoedema were given as '+'. Gray background indicates multiple genotypes in the same study.

Abbreviations. LGMD: limb-girdle muscular dystrophy, R1 (CAPN): LGMD R1 calpain3-related, R2 (DYSF): LGMD R2 dysferlin-related, R4 (SGC): LGMD R4  $\beta$ -sarcoglycan-related, R9 (FKRP): LGMD R9 FKRP-related, R12 (Ano5): LGMD R12 anoctamin5-related, R19 (GMPPB): LGMD R19 GMPPB-related, N/A: not applicable

Abbreviations. LGMD: limb-girdle muscular dystrophy, R1 (CAPN): LGMD R1 calpain3-related, R2 (DYSF): LGMD R2 dysferlin-related, R4 (SGC): LGMD R4  $\beta$ -sarcoglycan-related, R9 (FKRP): LGMD R9 FKRP-related, R12 (Ano5): LGMD R12 anoctamin5-related, R19 (GMPPB): LGMD R19 GMPPB-related, N/A: not applicable
