# Supplementary material for: A Straightforward Approach to Analyze Skeletal Muscle MRI in Limb-Girdle Muscular Dystrophy for Differential Diagnosis: A Systematic Review
Source: MDPI journal article supplement (doi:10.3390/muscles2040029), 2023-11-08
Supplement: s1 [file s1]

Supplementary Table. The quantitative synthesis; mean values of fat%, FF%, sFat% and each numbers

|                           | R1      |           |        |          |         | R2    |         |           |        |          | R3-6    |       | R9      |           |        |          |         | R12   |         |           |        |          | R19     |       |         |           |       |       |
|---------------------------|---------|-----------|--------|----------|---------|-------|---------|-----------|--------|----------|---------|-------|---------|-----------|--------|----------|---------|-------|---------|-----------|--------|----------|---------|-------|---------|-----------|-------|-------|
|                           | n(fat%) | mean fat% | n(FF%) | mean FF% | total n | sFat% | n(fat%) | mean fat% | n(FF%) | mean FF% | total n | sFat% | n(fat%) | mean fat% | n(FF%) | mean FF% | total n | sFat% | n(fat%) | mean fat% | n(FF%) | mean FF% | total n | sFat% | n(fat%) | mean fat% |       |       |
| muscle                    |         |           |        |          |         |       |         |           |        |          |         |       |         |           |        |          |         |       |         |           |        |          |         |       | mean    |           |       |       |
| Rectus abdominis          | 18      | 7.2       |        |          | 18      | 7.20  | 33      | 8.18      |        |          | 33      | 8.18  | 60      | 1         |        |          |         |       | 18      | 0         |        |          | 18      | 0.00  |         |           |       |       |
| Iliopsoas                 | 62      | 25.47     |        |          | 62      | 25.47 | 49      | 19.55     |        |          | 49      | 19.55 | 62      | 10        |        |          |         |       | 23      | 0         |        |          | 23      | 0.00  |         |           |       |       |
| Lumbar erector spinae     | 18      | 56.8      |        |          | 18      | 56.80 | 27      | 50        |        |          | 27      | 50.00 | 52      | 30        |        |          |         |       | 35      | 11.03     |        |          | 35      | 11.03 | 13      | 63.43     |       |       |
| Gluteus Maximus           | 85      | 26.35     |        |          | 85      | 26.35 | 169     | 12.95     |        |          | 169     | 12.95 | 64      | 32.33     | 44     | 64       |         | 44    | 64.00   | 52        | 3.85   | 24       | 38.1    | 76    | 14.67   | 7         | 32.8  |       |
| Gluteus Medius            | 85      | 42.14     |        |          | 85      | 42.14 | 138     | 11.62     |        |          | 138     | 11.62 | 64      | 47.91     | 6      | 23.33    |         | 6     | 23.33   | 47        | 3.46   |          |         | 47    | 3.46    | 7         | 90    |       |
| Gluteus Minimus           | 80      | 50.72     |        |          | 80      | 50.72 | 133     | 45.22     |        |          | 133     | 45.22 | 62      | 51.2      |        |          |         |       | 52      | 4.16      |        |          | 52      | 4.16  | 7       | 6.4       |       |       |
| Tensor Fascia Latae       | 70      | 27.66     |        |          | 70      | 27.66 | 90      | 51.46     |        |          | 90      | 51.46 | 65      | 7.2       |        |          |         |       | 23      | 0         |        |          | 23      | 0.00  |         |           |       |       |
| Piriformis                |         |           |        |          |         |       | 92      | 0         |        |          | 92      | 0.00  | 62      | 38        |        |          |         |       |         |           |        |          |         |       | 7       | 32.8      |       |       |
| Vastus lateralis          | 128     | 22.53     | 30     | 46.55    | 158     | 27.09 | 194     | 42.15     | 21     | 47.66    | 215     | 42.69 | 71      | 10.99     | 44     | 29.69    | 21      | 29.9  | 65      | 29.76     | 83     | 10.41    | 24      | 28.5  | 107     | 14.47     | 13    | 16.83 |
| Vastus medialis           | 128     | 22.89     | 30     | 45.32    | 158     | 27.15 | 194     | 43.91     | 21     | 49.2     | 215     | 44.43 | 71      | 15.3      | 44     | 27.71    | 21      | 31.57 | 65      | 28.96     | 83     | 9.52     | 24      | 32.6  | 107     | 14.70     | 13    | 24.58 |
| Vastus intermedius        | 128     | 27.29     | 11     | 52       | 139     | 29.25 | 194     | 42.05     | 21     | 50.4     | 215     | 42.87 | 71      | 10.99     | 6      | 23.33    | 21      | 33.6  | 27      | 31.32     | 83     | 8.85     | 24      | 29.9  | 107     | 13.57     | 13    | 33.85 |
| Rectus femoris            | 123     | 21.66     | 30     | 42.88    | 153     | 25.82 | 189     | 34.12     | 21     | 43.6     | 210     | 35.07 | 69      | 8         | 38     | 19.48    | 21      | 23.3  | 59      | 20.84     | 83     | 3.43     | 24      | 21.6  | 107     | 7.51      | 13    | 30.83 |
| Adductor magnus           | 113     | 52.69     | 11     | 61.5     | 124     | 53.47 | 177     | 43.41     | 21     | 53.61    | 198     | 44.49 | 71      | 61.17     | 6      | 55       | 21      | 59.13 | 27      | 58.21     | 83     | 20.62    | 24      | 49.3  | 107     | 27.05     | 7     | 67.2  |
| Adductor Longus           | 80      | 43.48     | 11     | 61.5     | 91      | 45.66 | 164     | 34.73     | 21     | 51.56    | 185     | 36.64 | 67      | 35.6      | 0      |          | 7       | 29.8  | 7       | 29.80     | 83     | 19.47    | 24      | 37.6  | 107     | 23.54     | 7     | 67.2  |
| Gracilis                  | 108     | 12.37     | 30     | 52.16    | 138     | 21.02 | 156     | 3.61      | 21     | 30.89    | 177     | 6.85  | 71      | 0         | 44     | 20.93    | 21      | 23.33 | 65      | 21.71     | 83     | 6.02     | 24      | 13.8  | 107     | 7.77      | 7     | 3.6   |
| Sartorius                 | 103     | 4.92      | 30     | 45.23    | 133     | 14.01 | 148     | 7.71      | 21     | 40.5     | 169     | 11.78 | 69      | 0         | 38     | 24.78    | 21      | 28.27 | 59      | 26.02     | 83     | 2.29     | 24      | 17.6  | 107     | 5.72      | 7     | 0     |
| Semitendinosus            | 123     | 48.1      | 30     | 68.66    | 153     | 52.13 | 189     | 46.29     | 21     | 49.73    | 210     | 46.63 | 69      | 10        | 38     | 56.13    | 21      | 49.83 | 59      | 53.89     | 83     | 14.07    | 24      | 33.7  | 107     | 18.47     | 13    | 59.29 |
| Semimembranosus           | 128     | 50.25     | 30     | 67.13    | 158     | 53.46 | 194     | 53.81     | 21     | 54.3     | 215     | 53.86 | 71      | 26.11     | 44     | 51.72    | 21      | 39.4  | 65      | 47.74     | 83     | 21.45    | 24      | 61.7  | 107     | 30.48     | 13    | 62.31 |
| Biceps femoris short head | 128     | 24.81     | 30     | 61.12    | 158     | 31.70 | 155     | 38.31     | 21     | 52.87    | 176     | 40.05 | 71      | 5.32      | 44     | 33.11    | 21      | 54.5  | 65      | 40.02     | 83     | 15.98    | 24      | 27.1  | 107     | 18.47     | 13    | 31.51 |
| Biceps femoris long head  | 128     | 53.32     | 30     | 61.12    | 158     | 54.80 | 194     | 47.78     | 21     | 52.87    | 215     | 48.28 | 71      | 36.61     | 44     | 66.19    | 21      | 54.5  | 65      | 62.41     | 66     | 13.98    | 24      | 56.6  | 90      | 25.35     | 13    | 62.31 |
| Medial gastrocnemius      | 123     | 34.39     | 19     | 58.03    | 142     | 37.55 | 227     | 56.65     | 12     | 48.4     | 239     | 56.24 | 78      | 0         | 44     | 33.48    | 32      | 39.65 | 76      | 36.08     | 83     | 30.12    |         | 83    | 30.12   | 13        | 40.68 |       |
| Lateral gastrocnemius     | 123     | 25.33     | 19     | 46.4     | 142     | 28.15 | 227     | 55.65     | 12     | 34.8     | 239     | 54.60 | 77      | 0         | 44     | 25.42    | 32      | 32.48 | 76      | 28.39     | 83     | 18.8     |         | 83    | 18.80   | 7         | 6.4   |       |
| Soleus                    | 123     | 36.5      | 19     | 56.97    | 142     | 39.24 | 227     | 60.47     | 12     | 43.3     | 239     | 59.61 | 78      | 2.82      | 44     | 22.24    | 32      | 23.59 | 76      | 22.81     | 83     | 11       |         | 83    | 11.00   | 7         | 5     |       |
| Peroneus Longus           | 80      | 15.77     | 19     | 41.71    | 99      | 20.75 | 194     | 45.87     | 12     | 44.3     | 206     | 45.78 | 78      | 1.08      | 44     | 19.03    | 32      | 24.85 | 76      | 21.48     | 54     | 0.56     |         | 54    | 0.56    | 7         | 7.1   |       |
| Tibialis anterior         | 123     | 9.42      | 19     | 17.2     | 142     | 10.46 | 227     | 33.65     | 12     | 26.5     | 239     | 33.29 | 78      | 3.58      | 44     | 5.23     | 32      | 12.98 | 76      | 8.49      | 78     | 1.09     |         | 78    | 1.09    | 13        | 42.66 |       |
| Tibialis posterior        | 98      | 1.01      | 19     | 11.4     | 117     | 2.70  | 183     | 32.07     | 12     | 29.5     | 195     | 31.91 | 76      | 0         |        |          | 32      | 21.3  | 32      | 21.30     | 49     | 0        |         | 49    | 0.00    | 7         | 0     |       |
| Extensor digitorum longus | 46      | 2.39      | 19     | 29.87    | 65      | 10.42 | 183     | 12.71     | 12     | 51.3     | 195     | 15.08 | 69      | 0.9       |        |          | 7       | 10    | 7       | 10.00     | 18     | 0        |         | 18    | 0.00    | 7         | 44.4  |       |
| Flexor Difitorum Longus   | 18      | 0         |        |          | 18      | 0.00  | 183     | 27.17     |        |          | 183     | 27.17 | 69      | 0         |        |          |         |       |         |           |        |          |         |       | 7       | 0         |       |       |

Abbreviations: R1: LGMD R1 calpain3-related, R2: LGMD R2 dysferlin-related, R3-6: collective name of LGMD R3-6 sarcoglycan-related, R9: LGMD R9 FKRП-related, R12 (Ano5): LGMD R12 anoctamin5-related, R19: LGMD R19 GMPPB-related, fat%: percentage of fat infiltration estimated by grading assessments, FF%: fat fraction, sFat%: overall percentage of fat infiltration by synthesizing FF% and fat% averages
