# Supplementary material for: A Straightforward Approach to Analyze Skeletal Muscle MRI in Limb-Girdle Muscular Dystrophy for Differential Diagnosis: A Systematic Review
Source: Muscles. 2023 Nov 8;2(4):374–88. doi: 10.3390/muscles2040029 (PMC12225514; doi:10.3390/muscles2040029)
Supplement: Supplementary file 1 [file muscles-02-00029-s001.zip]

Archive with 6 entries (6 files):
- Figure S1_Grading system history.pdf
- Figure S2_Each grading system and nomogram.pdf
- Figure S3_edema qualitative synthesis.pdf
- Muscles_Supple_Method.pdf
- Table S1_demographic data.pdf
- Table S2_Quantitative synthesis.pdf
