# Supplementary material for: A Straightforward Approach to Analyze Skeletal Muscle MRI in Limb-Girdle Muscular Dystrophy for Differential Diagnosis: A Systematic Review
Source: Muscles. 2023 Nov 8;2(4):374–88. doi: 10.3390/muscles2040029 (PMC12225514; doi:10.3390/muscles2040029)
Supplement: Supplementary file 1 [file muscles-02-00029-s001.zip › Table S1_demographic data.pdf]

Supplementary Table 1. demographic data and summary of study method

| Genotype       |      |     |                                     | N       |     | MRI condition |           |                        |                   | Age   |       |      | Sex |       | Duration |       |      | Assessment |   |   | Fat    |         | Edema  |                     | Quantitative |             |  |
|----------------|------|-----|-------------------------------------|---------|-----|---------------|-----------|------------------------|-------------------|-------|-------|------|-----|-------|----------|-------|------|------------|---|---|--------|---------|--------|---------------------|--------------|-------------|--|
|                |      |     |                                     | T       | I   | Tesla         | Sequences | Lesion                 | Range             | n     | SD    | M    | M % | Range | Mean     | SD    | FG   | E          | Q | G | Result | G       | Result | Method              | Result       |             |  |
| First author   | Y    | Ref | Phenotype                           | Region  |     |               |           |                        |                   |       |       |      |     |       |          |       |      |            |   |   |        |         |        |                     |              |             |  |
| R1 (CAPN)      |      |     |                                     |         |     |               |           |                        |                   |       |       |      |     |       |          |       |      |            |   |   |        |         |        |                     |              |             |  |
| Aivazoglou LU  | 2022 |     | LGMD                                | BRA     | 18  | 18            | 1.5       | T1, STIR               | WB                | 12~68 | 35.4  | 16.0 | 9   | 50.0  | 1~34     | 16.3  | 9.7  | +          | + |   | 5      | heatmap | 4      | NID                 |              |             |  |
| Barp A         | 2020 |     | LGMD                                | EUR     | 57  | 57            | 1.5-3     | T1                     | LE(52), other(28) | 7~78  | 38.4  | 15.8 | 20  | 35.0  | N/D      | N/D   | N/D  | +          |   |   | 4B     | heatmap |        |                     |              |             |  |
| Stramare R     | 2010 |     | LGMD                                | ITA     | 10  | 10            | 1.5       | T1, TIRM               | WB                | 17~65 | 32.0  | N/D  | 8   | 80.0  | N/D      | N/D   | N/D  | +          | + |   | 6      | graph   | 6      | graph               |              |             |  |
| Peric S        | 2019 |     | LGMD                                | SRB     | 19  | 8             | N/D       | T1, T2, PD, DIXON      | LE                | 9~37  | 25.4  | 10.4 | 8   | 42.0  | 0~19     | 9.8   | 5.9  | +          |   |   | 6      | NID     |        |                     |              |             |  |
| Feng X         | 2018 |     | LGMD                                | CHN     | 32  | 32            | 3         | T1                     | UL(28), C(29)     | 12~52 | 27.0  | 9.6  | 18  | 56.3  | N/D      | N/D   | N/D  | +          |   |   | 5      | graph   |        |                     |              |             |  |
| Fischer D      | 2005 |     | LGMD                                | EUR     | 5   | 5             | 1.5       | T1, SPIR               | LE                | 18~57 | 35.6  | 15.9 | 2   | 40.0  | 8~20     | 16.0  | 6.7  | +          | + |   | 6      | table   |        | NID                 |              |             |  |
| Degardin A     | 2010 |     | LGMD                                | FRA     | 3   | 2             | N/D       | T1, STIR               | Various           | N/D   | 36.7  | 7.4  | N/D | N/D   | N/D      | 16.0  | 2.0  | +          | + |   | 4C     | NID     | —      | NID                 |              |             |  |
| Schlaeger S    | 2021 |     | LGMD                                | DEU     | 5   | 5             | 3         | DIXON                  | UL                | 26~84 | 55.6  | 14.7 | 4   | 30.8  | 1~32     | 9.5   | 9.5  | +          |   | + | 4B     | table   |        |                     | FF           |             |  |
| Borsato C      | 2006 |     | LGMD                                | ITA     | 10  | 10            | 1         | T1, T2, STIR           | LE                | 17-60 | 32.0  | N/D  | 8   | 80.0  | N/D      | 18.3  | N/D  | +          | + |   | 6      | graph   | 6      | graph               |              |             |  |
| Arrigoni F     | 2018 |     | LGMD                                | ITA     | 11  | 11            | 3         | T1, T2, DIXON, SPIR    | UL                | 22~51 | 36.5  | 9.8  | 4   | 36.4  | 13~30    | 20.6  | 6.7  |            |   | + |        |         |        | FF, T2fat, FA, MD   | graph        |             |  |
| Forsting J     | 2022 |     | LGMD                                | DEU     | 19  | 19            | 3         | DIXON, MESE, DW, SPIR  | LE                | 25~68 | 39.5  | 13.3 | 9   | 47.4  | 10~42    | 20.3  | 7.4  |            |   | + |        |         |        | FF, FA, MD, RD, SNR | heatmap      |             |  |
| R2 (DYSF)      |      |     |                                     |         |     |               |           |                        |                   |       |       |      |     |       |          |       |      |            |   |   |        |         |        |                     |              |             |  |
| Stramare R     | 2010 |     | LGMD                                | ITA     | 16  | 16            | 1.5       | T1, TIRM               | WB                | 16~50 | 33.0  | N/D  | 13  | 81.3  | N/D      | N/D   | N/D  | +          | + |   | 6      | graph   | 6      | graph               |              |             |  |
| Moore U        | 2021 |     | LGMD(114), MM(54)                   | Jain F  | 168 | 131           | N/D       | T1                     | LE(59), C(72)     | 11~86 | 36.7  | N/D  | 75  | 44.6  | 1-51     | 15.9  | N/D  | +          |   |   | 5      | graph   |        |                     |              |             |  |
| Bardakov SN    | 2021 |     | LGMD(14), MM(11)                    | RUS     | 25  | 25            | 1.5       | T1, T2, STIR, T2MSME   | LE                | N/D   | 37.0  | N/D  | 16  | 64.0  | N/D      | N/D   | N/D  | +          | + | + | 6      | graph   | —      | graph               | FF, T2t      | N/D         |  |
| Yang M         | 2022 |     | LGMD                                | CHN     | 8   | 8             | N/D       | T1, T2 (N/D in method) | Th                | 24~59 | 32.0  | N/D  | 5   | 62.5  | 0~5      | 1.5   | N/D  | +          | + |   | 4B     | graph   | 4      | graph               |              |             |  |
| Díaz J         | 2016 |     | LGMD(7)/MM(20)                      | CHL     | 27  | 27            | 1.5       | T1, STIR               | WB                | 19~51 | 30.9  | 7.6  | 12  | 44.4  | 2~24     | 10.7  | 5.6  | +          | + |   | 5      | graph   | —      | NID                 |              |             |  |
| Paradas C      | 2010 |     | LGMD(12), MM(14), ASC(3)            | ESP     | 29  | 29            | 1.5       | T1, STIR               | LE                | 2~72  | 32.3  | 16.8 | N/D | N/D   | 0~34     | 8.3   | 9.8  | +          | + |   | 4D     | NID     | —      | NID                 |              |             |  |
| Kesper K       | 2009 |     | LGMD(2), MM(3), CK(1)               | DEU     | 6   | 6             | 3         | T1, T2, SPAIR          | WB                | 26~48 | 35.0  | 8.0  | 4   | 66.7  | 9~18     | 11.3  | 6.6  | +          | + |   | 5      | table   | —      | NID                 |              |             |  |
| Fischer D      | 2005 |     | LGMD                                | EUR     | 5   | 5             | 1.5       | T1, SPIR               | LE                | 27~39 | 32.2  | 4.8  | 2   | 40.0  | 8~21     | 13.4  | 5.0  | +          | + |   | 6      | table   | —      | NID                 |              |             |  |
| Degardin A     | 2010 |     | LGMD                                | FRA     | 2   | 2             | N/D       | T1, STIR               | Various           | N/D   | 35.5  | 13.4 | N/D | N/D   | N/D      | 13.5  | 4.9  | +          | + |   | 4C     | NID     | —      | NID                 |              |             |  |
| Jin S          | 2016 |     | LGMD(31), MM(23), CK(2), PDM(4)     | CHN     | 60  | 31            | 3         | T1, SPAIR              | T                 | 16~51 | 29.4  | 7.4  | 30  | 50    | 0.17-25  | 8.2   | 5.7  | +          | + |   | 6      | graph   | 5      | graph               |              |             |  |
| Borsato C      | 2006 |     | LGMD                                | ITA     | 18  | 17            | 1         | T1, T2, STIR           | LE                | 16-50 | 33.0  | N/D  | 14  | 77.8  | N/D      | 14.8  | N/D  | +          | + |   | 6      | graph   | 6      | graph               |              |             |  |
| Arrigoni F     | 2018 |     | LGMD                                | ITA     | 9   | 9             | 3         | T1, T2, DIXON, SPIR    | T                 | 34~57 | 49.4  | 7.3  | 5   | 55.6  | 12~31    | 25.7  | 5.8  |            |   | + |        |         |        | FF, T2fat, FA, MD   | graph        |             |  |
| Reyngoudt H    | 2021 |     | LGMD/MM (not detailed)              | FRA     | 12  | 12            | 3         | DIXON                  | LE                | N/D   | 36.7* | N/D  | 6   | 50.0  | N/D      | 19.1* | N/D  |            |   | + |        |         |        | FF                  |              | graph table |  |
| R3-6 (SGC)     |      |     |                                     |         |     |               |           |                        |                   |       |       |      |     |       |          |       |      |            |   |   |        |         |        |                     |              |             |  |
| Tasca G        | 2018 |     | LGMD- R3(38), R4(12), R5(18), R6(1) | EUR     | 69  | 69            | 1.5       | T1                     | LE                | 4~59  | 22.8  | 15.7 | 34  | 49.3  | 0~47     | 12.9  | 11.3 | +          |   |   | 5      | heatmap |        |                     |              |             |  |
| Lodi R         | 1997 |     | LGMD                                | GBR     | 7   | 7             | 2         | T1, T2                 | LE                | 11~25 | 15.3  | 4.7  | 4   | 57.1  | 3~12     | 7.3   | 3.0  | +          |   |   | 4A     | table   |        |                     |              |             |  |
| Fischer D      | 2005 |     | LGMD-R3                             | EUR     | 2   | 2             | 1.5       | T1, SPIR               | LE                | 12~60 | 36.0  | 33.9 | 1   | 50.0  | 10~46    | 28.0  | 25.5 | +          | + |   | 6      | table   | —      | NID                 |              |             |  |
| Degardin A     | 2010 |     | LGMD- R4(1), R5(2)                  | FRA     | 3   | 1             | N/D       | T1, STIR               | Various           | N/D   | 30.3  | 2.1  | N/D | N/D   | N/D      | 24.0  | 4.0  | +          | + |   | 4C     | NID     | —      | NID                 |              |             |  |
| R7 (TCAP)      |      |     |                                     |         |     |               |           |                        |                   |       |       |      |     |       |          |       |      |            |   |   |        |         |        |                     |              |             |  |
| Chen H         | 2020 |     | LGMD                                | CHN     | 5   | 5             | 3         | T1, T2, STIR           | LE                | 28~47 | 34.0  | 7.5  | 3   | 60.0  | 11~30    | 18.0  | 7.2  | +          |   |   | 5      | table   |        |                     |              |             |  |
| R9 (FKRP)      |      |     |                                     |         |     |               |           |                        |                   |       |       |      |     |       |          |       |      |            |   |   |        |         |        |                     |              |             |  |
| Willis TA      | 2014 |     | LGMD                                | EUR     | 38  | 38            | 3         | T1, DIXON              | T                 | 18~64 | 40.7  | 12.5 | 19  | 50.0  | 0~49     | 18.6  | 10.1 | +          | + |   | 6      | table   |        |                     | FF           | table       |  |
| Fischer D      | 2005 |     | LGMD                                | EUR     | 6   | 6             | 1.5       | T1, SPIR               | LE                | 32~48 | 40.2  | 6.1  | 3   | 50.0  | 0-35     | 23.5  | 12.2 | +          | + |   | 6      | table   | —      | NID                 |              |             |  |
| Degardin A     | 2010 |     | LGMD                                | FRA     | 7   | 5             | N/D       | T1, STIR               | Various           | N/D   | 34.6  | 13.8 | N/D | N/D   | N/D      | 19.7  | 12.8 | +          | + |   | 4C     | NID     | —      | NID                 |              |             |  |
| Bourteel H     | 2009 |     | LGMD                                | FRA     | 11  | 11            | 1.5       | T1, T2                 | UE-LE             | N/D   | 32.0  | 15.0 | 5   | 45.5  | 2.5~45   | 23.0  | 11.0 | +          |   |   | 6      | NID     |        |                     |              |             |  |
| Revsbech KL    | 2022 |     | LGMD                                | DNK     | 14  | 14            | 3         | T1, DIXON              | WB                | 19~60 | 36.4  | 11.8 | 6   | 42.9  | 6~46     | 21.5  | 11.8 |            |   | + |        |         |        | FF                  | graph        |             |  |
| Løkken N       | 2016 |     | LGMD                                | DNK     | 11  | 11            | 3         | T1, DIXON              | LL                | 22~62 | 38.9  | 12.8 | 8   | 72.7  | 5~41     | 20.3  | 9.3  |            |   | + |        |         |        | FF, CSA, CCSA       | graph        |             |  |
| Reyngoudt H    | 2021 |     | LGMD                                | FRA     | 7   | 7             | 3         | DIXON                  | LE                | N/D   | 40.9* | N/D  | 2   | 28.6  | N/D      | 26.9* | N/D  |            |   | + |        |         |        | FF                  |              | graph table |  |
| R12 (ANO5)     |      |     |                                     |         |     |               |           |                        |                   |       |       |      |     |       |          |       |      |            |   |   |        |         |        |                     |              |             |  |
| Sarkozy A      | 2012 |     | LGMD(12), PM(3), MM(4), CK(6)       | EUR     | 25  | 25            | N/D       | T1, STIR               | LE                | 11~69 | 44.2  | 15.2 | 20  | 80.0  | 0~29     | 12.0  | 8.9  | +          | + |   | 4B     | table   | —      | NID                 |              |             |  |
| Ylikallio E    | 2016 |     | LGMD(5), PM(7), MM(1), CK(1)        | FIN     | 14  | 14            | 1.5       | T1, STIR               | LE                | 31~69 | 54.4  | 9.9  | 8   | 57.1  | 6~48     | 22.3  | 12.8 | +          | + |   | 4A     | table   | 4      | table               |              |             |  |
| Silva AMS      | 2019 |     | LGMD(25), PM(7), CK(4), MM(1)       | BRA     | 37  | 18            | N/D       | T1, STIR               | WB(7), LE(11)     | 12~72 | 45.8  | 16.5 | 27  | 73.0  | 0~20     | 8.9   | 5.5  | +          | + |   | 5      | heatmap | —      | NID                 |              |             |  |
| Mahjneh I      | 2012 |     | PM(1), MM(4)                        | FIN/NLD | 5   | 5             | <1.5      | T1, T2, STIR           | various           | 29~73 | 51.8  | 19.5 | 5   | 100   | 9~23     | 15.6  | 6.6  | +          | + |   | 4C     | table   | 4      | table               |              |             |  |
| Khawajazada T  | 2021 |     | LGMD(13), PM(2), CK(2)              | DNK     | 17  | 17            | 3         | T1, DIXON              | WB                | 31~73 | 51.8  | 10.4 | 10  | 58.8  | 1~42     | 17.4  | 16.3 | +          |   | + | 6      | graph   |        |                     | FF           | Graph       |  |
| De Wel B       | 2022 |     | LGMD/MM(15), PM(9)                  | BEL     | 24  | 24            | 1.5       | T1, DIXON              | WB                | 19~70 | 43.8  | 13.9 | 20  | 83.3  | 2~33     | 14.5  | 10.8 |            |   | + |        |         |        | FF                  |              | Graph table |  |
| R14 (POMT2)    |      |     |                                     |         |     |               |           |                        |                   |       |       |      |     |       |          |       |      |            |   |   |        |         |        |                     |              |             |  |
| Østergaard ST  | 2017 |     | LGMD                                | EUR     | 12  | 12            | N/D       | T1                     | LE                | 17~60 | 33.2  | 15.9 | 5   | 41.7  | 3~54     | 24.3  | 16.1 | +          |   |   | 6      | NID     |        |                     |              |             |  |
| R19 (GMPPB)    |      |     |                                     |         |     |               |           |                        |                   |       |       |      |     |       |          |       |      |            |   |   |        |         |        |                     |              |             |  |
| Oestergaard ST | 2016 |     | LGMD                                | DNK/FRA | 6   | 4             | N/D       | T1                     | WB                | 27~51 | 37.5  | 11.9 | 3   | 50.0  | 10~36    | 18.8  | 11.7 | +          |   |   | 6      | graph   |        |                     |              |             |  |
| Polavarapu K   | 2021 |     | LGMD                                | IND     | 12  | 8             | 1.5       | T1, T2, STIR           | LE                | 27~54 | 40.7  | 8.2  | 6   | 50.0  | 2~39     | 17.6  | 10.7 | +          | + |   | 4B     | NID     | 6      | NID                 |              |             |  |
| Siddiqui S     | 2022 |     | LGMD                                | IND     | 7   | 7             | 1.5       | T1, T2, STIR           | LE                | 32~63 | 49.6  | 10.8 | 4   | 57.1  | 10~41    | 25.0  | 11.5 | +          | + |   | 5      | graph   | 6      | NID                 |              |             |  |
| D3 (HNRNPDL)   |      |     |                                     |         |     |               |           |                        |                   |       |       |      |     |       |          |       |      |            |   |   |        |         |        |                     |              |             |  |
| Berardo A      | 2019 |     | LGMD                                | ARG     | 5   | 3             | N/D       | T1, STIR               | LE                | 56~68 | 58.8  | 8.6  | 3   | 60.0  | 2~21     | 13.2  | 9.0  | +          | + |   | 5or6   | NID     | —      | NID                 |              |             |  |
| D5/R12 (COL6)  |      |     |                                     |         |     |               |           |                        |                   |       |       |      |     |       |          |       |      |            |   |   |        |         |        |                     |              |             |  |
| Deconinck N    | 2015 |     | Bethlem                             | FRA     | 35  | 23            | N/D       | T1                     | WB(7), LE(16)     | 14~75 | 40.2  | 17.7 | 14  | 40.0  | 4~69     | 30.5  | 18.4 | +          |   |   | 4A     | NID     |        |                     |              |             |  |
| Salim R        | 2020 |     | Bethlem                             | DNK     | 15  | 15            | 3         | T1, DIXON              | WB(5), LE(10)     | 13~57 | 34.6  | 13.9 | 11  | 73.3  | 10~54    | 26.3  | 14.9 |            |   | + |        |         |        | FF                  |              | graph       |  |
